# Supplementary material for: Comparison of the Antibiotic Resistance of Escherichia coli Populations from Water and Biofilm in River Environments
Source: MDPI journal article supplement (doi:10.3390/pathogens13020171), 2024-02-13
Supplement: s1 [file s1]

**Supplementary Table S7. Primers used for PCR.**

| Gene Families                       | Primer | Sequence 5'→3'         | Reference |
|-------------------------------------|--------|------------------------|-----------|
| <i>bla</i> <sub>CTX-M-1-group</sub> | f      | TCTTCCAGAATAAGGAATCCC  | [22]      |
|                                     | r      | CCGTTTCCGCTATTACAAAC   |           |
| <i>bla</i> <sub>CTX-M-2-group</sub> | f      | ATGATGACTCAGAGCATTCG   | [24]      |
|                                     | r      | TGGGTTACGATTTTCGCCGC   |           |
| <i>bla</i> <sub>CTX-M-9-group</sub> | f      | ATGGTGACAAAGAGAGTGCA   | [23]      |
|                                     | r      | CCCTTCGGCGATGATTCTC    |           |
| <i>bla</i> <sub>SHV</sub>           | f      | TGGTTATGCGTTATATTCGCC  | [25]      |
|                                     | r      | GGTTAGCGTTGCCAGTGCT    |           |
| <i>bla</i> <sub>TEM</sub>           | f      | TCCGCTCATGAGACAATAACC  | [22]      |
|                                     | r      | TTGGTCTGACAGTTACCAATGC |           |
| <i>Bla</i> <sub>KPC</sub>           | f      | CAGCTCATTCAAGGGCTTTC   | [26]      |
|                                     | r      | AGTCATTTGCCGTGCCATAC   |           |
