# Supplementary material for: Comparison of the Antibiotic Resistance of Escherichia coli Populations from Water and Biofilm in River Environments
Source: MDPI journal article supplement (doi:10.3390/pathogens13020171), 2024-02-13
Supplement: s1 [file s1]

**Supplementary Table S2. Antibiotic resistances of *E. coli* Mur river water and sediment isolates in comparison between upstream and downstream of the WWTP.** The proportions, and in parentheses, the number of isolates resistant to each antibiotic and for all classes of antimicrobial resistance are given with the corresponding p-values of the statistical tests. Isolates were classified as wildtype when showing no resistance to the tested antibiotics. Isolates with resistance to one or two classes of the tested antibiotics were classified as resistant. Resistance to three or more classes of the tested antibiotics was classified as multi-resistant. P-values < 0.05 were considered as statistically significant. P-values with more than four decimal places containing a value of nine were rounded to one. us – upstream of the WWTP; ds – downstream of the WWTP

|                                   | Mur water us<br>(144 isolates) | Mur water ds<br>(117 isolates) | p-value | Mur sediment us<br>(113 isolates) | Mur sediment ds<br>(195 isolates) | p-value |
|-----------------------------------|--------------------------------|--------------------------------|---------|-----------------------------------|-----------------------------------|---------|
| <b>β-Lactams</b>                  |                                |                                |         |                                   |                                   |         |
| Ampicillin                        | 13.89 % (20)                   | 6.84 % (8)                     | 0.07    | 12.39 % (14)                      | 16.92 % (33)                      | 0.33    |
| Amoxicillin/<br>clavulanic acid   | 3.47 % (5)                     | 4.27 % (5)                     | 0.76    | 0.88 % (1)                        | 7.69 % (15)                       | < 0.01  |
| Cefalexin                         | 4.17 % (6)                     | 2.56 % (3)                     | 0.74    | 3.54 % (4)                        | 3.08 % (6)                        | 1       |
| Cefuroxime                        | 4.17 % (6)                     | 1.71 % (2)                     | 0.3     | 3.54 % (4)                        | 2.56 % (5)                        | 0.73    |
| Cefoxitin                         | 1.39 % (2)                     | 0.85 % (1)                     | 1       | 1.77 % (2)                        | 0.51 % (1)                        | 0.56    |
| Cefotaxime                        | 3.47 % (5)                     | 1.71 % (2)                     | 0.46    | 4.42 % (5)                        | 2.05 % (4)                        | 0.3     |
| Piperacillin/<br>Tazobactam       | 1.39 % (2)                     | 1.71 % (2)                     | 1       | 0 % (0)                           | 2.56 % (5)                        | 0.16    |
| Ceftazidime                       | 2.78 % (4)                     | 1.71 % (2)                     | 0.69    | 3.54 % (4)                        | 2.05 % (4)                        | 0.47    |
| Cefepime                          | 2.78 % (4)                     | 2.56 % (3)                     | 1       | 5.31 % (6)                        | 2.05 % (4)                        | 0.18    |
| Imipenem                          | 0 % (0)                        | 0 % (0)                        | 1       | 0 % (0)                           | 0.51 % (1)                        | 1       |
| Meropenem                         | 0 % (0)                        | 0 % (0)                        | 1       | 0 % (0)                           | 0.51 % (1)                        | 1       |
| <b>Quinolones</b>                 |                                |                                |         |                                   |                                   |         |
| Moxifloxacin                      | 4.17 % (6)                     | 7.69 % (9)                     | 0.29    | 4.42 % (5)                        | 4.1 % (8)                         | 1       |
| Ciprofloxacin                     | 4.86 % (7)                     | 7.69 % (9)                     | 0.44    | 5.31 % (6)                        | 6.15 % (12)                       | 1       |
| Nalidixic acid                    | 11.81 % (17)                   | 8.55 % (10)                    | 0.42    | 24.78 % (28)                      | 10.77 % (21)                      | < 0.01  |
| <b>Tetracyclines</b>              |                                |                                |         |                                   |                                   |         |
| Tetracycline                      | 10.42 % (15)                   | 10.26 % (12)                   | 1       | 8.85 % (10)                       | 11.28 % (22)                      | 0.57    |
| Tigecycline                       | 0 % (0)                        | 0 % (0)                        | 1       | 0 % (0)                           | 0 % (0)                           | 1       |
| <b>Aminoglycosides</b>            |                                |                                |         |                                   |                                   |         |
| Gentamicin                        | 0.69 % (1)                     | 0 % (0)                        | 1       | 0 % (0)                           | 4.1 % (8)                         | 0.03    |
| Amikacin                          | 0 % (0)                        | 0 % (0)                        | 1       | 0 % (0)                           | 0 % (0)                           | 1       |
| <b>Antifolate</b>                 |                                |                                |         |                                   |                                   |         |
| Trimethoprim/<br>sulfamethoxazole | 9.72 % (14)                    | 6.84 % (8)                     | 0.5     | 5.31 % (6)                        | 7.69 % (15)                       | 0.49    |
| <b>Polymyxins</b>                 |                                |                                |         |                                   |                                   |         |
| Colistin                          | 0 % (0)                        | 0 % (0)                        | 1       | 0 % (0)                           | 0 % (0)                           | 1       |
| <b>Chloramphenicols</b>           |                                |                                |         |                                   |                                   |         |
| Chloramphenicol                   | 2.08 % (3)                     | 2.56 % (3)                     | 1       | 1.77 % (2)                        | 4.1 % (8)                         | 0.33    |
