# Supplementary material for: Comparison of the Antibiotic Resistance of Escherichia coli Populations from Water and Biofilm in River Environments
Source: MDPI journal article supplement (doi:10.3390/pathogens13020171), 2024-02-13
Supplement: s1 [file s1]

**Supplementary Table S6.** Antibiotic resistance of *E. coli* Drava river isolates from upstream and downstream of the WWTP in comparison between water and sediment. The proportions, and in parentheses, the number of isolates resistant to each antibiotic and for all classes of antimicrobial resistance are given with the corresponding p-values of the statistical tests. P-values <0.05 were considered as statistically significant. P-values with more than four decimal places containing a value of nine were rounded to one. us – upstream of the WWTP; ds – downstream of the WWTP.

|                                   | Drava water us<br>(90 isolates) | Drava sediment us<br>(33 isolates) | p-value | Drava water ds<br>(105 isolates) | Drava sediment ds<br>(34 isolates) | p-value |
|-----------------------------------|---------------------------------|------------------------------------|---------|----------------------------------|------------------------------------|---------|
| <b>β-Lactams</b>                  |                                 |                                    |         |                                  |                                    |         |
| Ampicillin                        | 13.33 % (12)                    | 18.18 % (6)                        | 0.57    | 16.19 % (17)                     | 11.76 % (4)                        | 0.78    |
| Amoxicillin/<br>clavulanic acid   | 12.22 % (11)                    | 18.18 % (6)                        | 0.39    | 10.48 % (11)                     | 8.82 % (3)                         | 1       |
| Cefalexin                         | 2.22 % (2)                      | 0 % (0)                            | 1       | 2.86 % (3)                       | 0 % (0)                            | 1       |
| Cefuroxime                        | 2.22 % (2)                      | 0 % (0)                            | 1       | 1.9 % (2)                        | 0 % (0)                            | 1       |
| Cefoxitin                         | 1.11 % (1)                      | 0 % (0)                            | 1       | 0.95 % (1)                       | 0 % (0)                            | 1       |
| Cefotaxime                        | 2.22 % (2)                      | 0 % (0)                            | 1       | 0.95 % (1)                       | 0 % (0)                            | 1       |
| Piperacillin/<br>Tazobactam       | 0 % (0)                         | 0 % (0)                            | 1       | 0 % (0)                          | 5.88 % (2)                         | 0.06    |
| Ceftazidime                       | 2.22 % (2)                      | 0 % (0)                            | 1       | 0 % (0)                          | 0 % (0)                            | 1       |
| Cefepime                          | 2.22 % (2)                      | 0 % (0)                            | 1       | 0.95 % (1)                       | 0 % (0)                            | 1       |
| Imipenem                          | 0 % (0)                         | 0 % (0)                            | 1       | 0 % (0)                          | 0 % (0)                            | 1       |
| Meropenem                         | 0 % (0)                         | 0 % (0)                            | 1       | 0 % (0)                          | 0 % (0)                            | 1       |
| <b>Quinolones</b>                 |                                 |                                    |         |                                  |                                    |         |
| Moxifloxacin                      | 2.22 % (2)                      | 6.06 % (2)                         | 0.29    | 8.57 % (9)                       | 0 % (0)                            | 0.11    |
| Ciprofloxacin                     | 3.33 % (3)                      | 6.06 % (2)                         | 0.61    | 8.57 % (9)                       | 11.76 % (4)                        | 0.52    |
| Nalidixic acid                    | 8.89 % (8)                      | 12.12 % (4)                        | 0.73    | 9.52 % (10)                      | 0 % (0)                            | 0.12    |
| <b>Tetracyclines</b>              |                                 |                                    |         |                                  |                                    |         |
| Tetracycline                      | 4.44 % (4)                      | 3.03 % (1)                         | 1       | 8.57 % (9)                       | 0 % (0)                            | 0.11    |
| Tigecycline                       | 0 % (0)                         | 0 % (0)                            | 1       | 0 % (0)                          | 0 % (0)                            | 1       |
| <b>Aminoglycosides</b>            |                                 |                                    |         |                                  |                                    |         |
| Gentamicin                        | 1.11 % (1)                      | 3.03 % (1)                         | 0.47    | 0 % (0)                          | 2.94 % (1)                         | 0.24    |
| Amikacin                          | 0 % (0)                         | 0 % (0)                            | 1       | 0.95 % (1)                       | 0 % (0)                            | 1       |
| <b>Antifolate</b>                 |                                 |                                    |         |                                  |                                    |         |
| Trimethoprim/<br>sulfamethoxazole | 8.89 % (8)                      | 12.12 % (4)                        | 0.73    | 10.48 % (11)                     | 0 % (0)                            | 0.07    |
| <b>Polymyxins</b>                 |                                 |                                    |         |                                  |                                    |         |
| Colistin                          | 0 % (0)                         | 0 % (0)                            | 1       | 0 % (0)                          | 0 % (0)                            | 1       |
| <b>Chloramphenicols</b>           |                                 |                                    |         |                                  |                                    |         |
| Chloramphenicol                   | 1.11 % (1)                      | 6.06 % (2)                         | 0.18    | 2.86 % (3)                       | 0 % (0)                            | 1       |
